# Supplementary material for: Sex Differences in Lung Imaging and SARS-CoV-2 Antibody Responses in a COVID-19 Golden Syrian Hamster Model
Source: PubMed Central journal article supplement (PMC8406232; doi:10.1128/mbio.00974-21), 2021-07-13
Supplement: mbio.00974-21-st001.pdf [file mbio.00974-21-st001.pdf]

**Supplementary table 1:** Concentrations (pg/mg total protein) of cytokines in the lungs and spleen of male and female hamsters at different days post infection (dpi). Mock-infected animal samples from 2, 4, or 7 dpi were pooled and used as 0 dpi. Data are presented as the mean  $\pm$  the standard error of the mean from one or two independent experiments (n=6-12/group) with no significant differences observed between the groups based on two-way ANOVA (mixed-effects analysis) followed by Bonferroni's multiple comparison test.

| DPI | Groups   | IL-10<br>Lungs  | TNF- $\alpha$<br>Spleen | IL-6<br>Spleen    | IL- $\beta$<br>Spleen | IL-10<br>Spleen   | IFN- $\alpha$<br>Spleen | IFN- $\beta$<br>Spleen | IFN- $\gamma$<br>Spleen |
|-----|----------|-----------------|-------------------------|-------------------|-----------------------|-------------------|-------------------------|------------------------|-------------------------|
| 0   | Male     | 28.3 $\pm$ 4.4  | 8.5 $\pm$ 2.5           | 30.7 $\pm$ 6.8    | 26.0 $\pm$ 10.0       | 23.2 $\pm$ 5.0    | 3.9 $\pm$ 0.6           | 8.4 $\pm$ 3.1          | 126.3 $\pm$ 30.1        |
|     | Female   | 35.9 $\pm$ 6.7  | 6.9 $\pm$ 2.5           | 16.2 $\pm$ 4.0    | 13.6 $\pm$ 5.0        | 12.6 $\pm$ 3.3    | 2.9 $\pm$ 0.6           | 7.4 $\pm$ 2.7          | 106.7 $\pm$ 24.6        |
|     | Combined | 31.8 $\pm$ 3.9  | 7.8 $\pm$ 1.7           | 24.1 $\pm$ 4.5    | 20.4 $\pm$ 6.0        | 18.4 $\pm$ 3.4    | 3.5 $\pm$ 0.4           | 8.0 $\pm$ 2.0          | 117.4 $\pm$ 19.1        |
| 2   | Male     | 48.6 $\pm$ 11.3 | 13.0 $\pm$ 2.7          | 78.2 $\pm$ 50.2   | 10.1 $\pm$ 5.2        | 65.4 $\pm$ 41.2   | 8.0 $\pm$ 1.2           | 17.3 $\pm$ 6.5         | 277.3 $\pm$ 78.2        |
|     | Female   | 43.2 $\pm$ 7.2  | 28.7 $\pm$ 8.8          | 38.6 $\pm$ 8.6    | 10.5 $\pm$ 3.0        | 30.6 $\pm$ 7.6    | 7.1 $\pm$ 1.1           | 27.3 $\pm$ 6.7         | 177.2 $\pm$ 42.0        |
|     | Combined | 45.9 $\pm$ 6.3  | 20.9 $\pm$ 5.2          | 58.4 $\pm$ 24.7   | 10.3 $\pm$ 2.8        | 48 $\pm$ 20.5     | 7.6 $\pm$ 0.8           | 22.3 $\pm$ 4.7         | 227.2 $\pm$ 45.2        |
| 4   | Male     | 38.5 $\pm$ 7.4  | 31.5 $\pm$ 19.1         | 18.9 $\pm$ 1.8    | 11.2 $\pm$ 5.0        | 862.7 $\pm$ 847.7 | 9.5 $\pm$ 5.6           | 37.5 $\pm$ 23.6        | 222.8 $\pm$ 156.3       |
|     | Female   | 34.7 $\pm$ 6.9  | 3.4 $\pm$ 1.1           | 775.5 $\pm$ 756.7 | 6.7 $\pm$ 2.7         | 74.4 $\pm$ 61.1   | 3.8 $\pm$ 1.4           | 3.6 $\pm$ 3.2          | 197.0 $\pm$ 110.9       |
|     | Combined | 36.6 $\pm$ 4.7  | 17.5 $\pm$ 10.3         | 397.2 $\pm$ 378.4 | 8.9 $\pm$ 2.8         | 468.6 $\pm$ 420.7 | 6.6 $\pm$ 2.9           | 20.5 $\pm$ 12.7        | 209.9 $\pm$ 88.9        |
| 7   | Male     | 25.0 $\pm$ 4.6  | 13.0 $\pm$ 9.5          | 54.6 $\pm$ 41.6   | 5.1 $\pm$ 2.1         | 37.4 $\pm$ 27.8   | 4.3 $\pm$ 1.6           | 14.0 $\pm$ 6.4         | 189.8 $\pm$ 95.6        |
|     | Female   | 22.2 $\pm$ 6.2  | 20.5 $\pm$ 8.4          | 38.5 $\pm$ 4.8    | 7.2 $\pm$ 1.9         | 29.9 $\pm$ 3.0    | 6.3 $\pm$ 1.2           | 20.9 $\pm$ 5.1         | 168.4 $\pm$ 21.6        |
|     | Combined | 23.1 $\pm$ 4.1  | 17.3 $\pm$ 6.0          | 45.4 $\pm$ 16.3   | 6.3 $\pm$ 1.4         | 33.1 $\pm$ 10.7   | 5.5 $\pm$ 1.0           | 18.0 $\pm$ 3.9         | 177.6 $\pm$ 38.2        |
